# Supplementary material
Source: publisher figshare collection journal article supplement (https://tandf.figshare.com/ndownloader/files/20077115)
Supplement: Supplementary file 1 [file 20077115]

Supplementary Table 1: Zircon LA-ICP-MS U-Pb data of the stratigraphy in the Dengzhangzi and Guojiadian basins of Yanshan, NE China

| Spot no. | | Th/U | | Isotopic ratios | | | | | | | | | | | | | Age | | | | | | | | Best age | 2σ |
| --- | --- | --- | --- | --- | --- | --- | --- | --- | --- | --- | --- | --- | --- | --- | --- | --- | --- | --- | --- | --- | --- | --- | --- | --- | --- | --- |
| 207Pb/206Pb | | | 2σ | | 207Pb/235U | | 2σ | | 206Pb/238U | | 2σ | | 207Pb/206Pb | | 2σ | | 207Pb/235U | 2σ | 206Pb/238U | 2σ | (Ma) | (Ma) |
| S180601 | | | | | | | | | | | | | | | | | | | | | | | | | | |
| S180601-2 | | 0.6 | | | 0.1135 | | 0.0024 | | 5.2902 | | 0.0650 | | 0.3381 | | 0.0036 | | 1856 | | 10 | | 1867 | 10 | 1877 | 17 | 1856 | 10 |
| S180601-3 | | 2.5 | | | 0.0526 | | 0.0015 | | 0.3419 | | 0.0078 | | 0.0472 | | 0.0005 | | 311 | | 31 | | 299 | 6 | 297 | 3 | 297 | 3 |
| S180601-6 | | 1.0 | | | 0.0525 | | 0.0037 | | 0.3179 | | 0.0214 | | 0.0439 | | 0.0008 | | 306 | | 120 | | 280 | 16 | 277 | 5 | 277 | 5 |
| S180601-7 | | 0.7 | | | 0.1674 | | 0.0046 | | 11.1159 | | 0.2459 | | 0.4815 | | 0.0075 | | 2532 | | 18 | | 2533 | 21 | 2534 | 32 | 2532 | 18 |
| S180601-10 | | 0.8 | | | 0.1666 | | 0.0036 | | 10.3501 | | 0.1366 | | 0.4505 | | 0.0051 | | 2524 | | 10 | | 2467 | 12 | 2398 | 22 | 2524 | 10 |
| S180601-11 | | 0.5 | | | 0.1660 | | 0.0038 | | 10.9174 | | 0.1586 | | 0.4770 | | 0.0056 | | 2518 | | 11 | | 2516 | 14 | 2514 | 25 | 2518 | 11 |
| S180601-12 | | 1.2 | | | 0.1619 | | 0.0039 | | 10.4436 | | 0.1771 | | 0.4680 | | 0.0060 | | 2475 | | 13 | | 2475 | 16 | 2475 | 26 | 2475 | 13 |
| S180601-13 | | 1.0 | | | 0.0526 | | 0.0027 | | 0.3533 | | 0.0166 | | 0.0487 | | 0.0007 | | 312 | | 81 | | 307 | 12 | 307 | 4 | 307 | 4 |
| S180601-16 | | 0.8 | | | 0.1608 | | 0.0035 | | 10.4232 | | 0.1305 | | 0.4701 | | 0.0052 | | 2464 | | 9 | | 2473 | 12 | 2484 | 23 | 2464 | 9 |
| S180601-17 | | 0.8 | | | 0.1647 | | 0.0038 | | 9.9404 | | 0.1920 | | 0.4377 | | 0.0053 | | 2505 | | 39 | | 2429 | 18 | 2340 | 24 | 2505 | 39 |
| S180601-18 | | 0.7 | | | 0.0522 | | 0.0043 | | 0.3366 | | 0.0264 | | 0.0467 | | 0.0009 | | 296 | | 144 | | 295 | 20 | 294 | 5 | 294 | 5 |
| S180601-20 | | 0.0 | | | 0.0525 | | 0.0014 | | 0.3512 | | 0.0068 | | 0.0486 | | 0.0005 | | 306 | | 25 | | 306 | 5 | 306 | 3 | 306 | 3 |
| S180601-21 | | 1.4 | | | 0.1650 | | 0.0040 | | 10.7878 | | 0.1908 | | 0.4742 | | 0.0063 | | 2507 | | 14 | | 2505 | 16 | 2502 | 28 | 2507 | 14 |
| S180601-22 | | 1.6 | | | 0.1697 | | 0.0054 | | 11.3782 | | 0.3183 | | 0.4863 | | 0.0091 | | 2554 | | 24 | | 2555 | 26 | 2555 | 39 | 2554 | 24 |
| S180601-23 | | 0.9 | | | 0.1636 | | 0.0036 | | 10.7714 | | 0.1460 | | 0.4775 | | 0.0054 | | 2493 | | 10 | | 2504 | 13 | 2516 | 24 | 2493 | 10 |
| S180601-24 | | 1.4 | | | 0.1677 | | 0.0053 | | 11.1382 | | 0.3074 | | 0.4818 | | 0.0089 | | 2535 | | 23 | | 2535 | 26 | 2535 | 39 | 2535 | 23 |
| S180601-26 | | 0.4 | | | 0.1682 | | 0.0037 | | 11.1986 | | 0.1582 | | 0.4830 | | 0.0056 | | 2540 | | 11 | | 2540 | 13 | 2540 | 25 | 2540 | 11 |
| S180601-27 | | 0.6 | | | 0.1600 | | 0.0037 | | 10.2250 | | 0.1576 | | 0.4636 | | 0.0056 | | 2455 | | 12 | | 2455 | 14 | 2456 | 25 | 2455 | 12 |
| S180601-28 | | 0.5 | | | 0.1663 | | 0.0036 | | 10.9616 | | 0.1427 | | 0.4782 | | 0.0054 | | 2520 | | 10 | | 2520 | 12 | 2519 | 23 | 2520 | 10 |
| S180601-29 | | 1.4 | | | 0.0525 | | 0.0026 | | 0.3603 | | 0.0163 | | 0.0498 | | 0.0007 | | 308 | | 77 | | 312 | 12 | 313 | 4 | 313 | 4 |
| S180601-30 | | 0.7 | | | 0.1459 | | 0.0039 | | 8.0022 | | 0.1641 | | 0.3980 | | 0.0056 | | 2298 | | 18 | | 2231 | 19 | 2160 | 26 | 2298 | 18 |
| S180601-31 | | 1.0 | | | 0.1529 | | 0.0067 | | 9.3956 | | 0.3937 | | 0.4458 | | 0.0113 | | 2378 | | 39 | | 2377 | 38 | 2377 | 50 | 2378 | 39 |
| S180601-34 | | 0.3 | | | 0.1551 | | 0.0036 | | 9.6430 | | 0.1554 | | 0.4511 | | 0.0056 | | 2402 | | 13 | | 2401 | 15 | 2400 | 25 | 2402 | 13 |
| S180601-35 | | 0.3 | | | 0.1626 | | 0.0034 | | 10.6768 | | 0.1261 | | 0.4764 | | 0.0051 | | 2483 | | 9 | | 2495 | 11 | 2511 | 22 | 2483 | 9 |
| S180601-37 | | 0.7 | | | 0.1622 | | 0.0034 | | 10.5147 | | 0.1207 | | 0.4703 | | 0.0050 | | 2478 | | 9 | | 2481 | 11 | 2485 | 22 | 2478 | 9 |
| S180601-38 | | 0.7 | | | 0.1660 | | 0.0036 | | 10.9261 | | 0.1483 | | 0.4773 | | 0.0055 | | 2518 | | 10 | | 2517 | 13 | 2516 | 24 | 2518 | 10 |
| S180601-39 | | 0.5 | | | 0.1572 | | 0.0034 | | 9.8715 | | 0.1233 | | 0.4554 | | 0.0050 | | 2426 | | 9 | | 2423 | 12 | 2419 | 22 | 2426 | 9 |
| S180601-40 | | 0.4 | | | 0.1615 | | 0.0035 | | 10.4014 | | 0.1357 | | 0.4672 | | 0.0052 | | 2471 | | 10 | | 2471 | 12 | 2471 | 23 | 2471 | 10 |
| S180601-41 | | 0.6 | | | 0.0523 | | 0.0025 | | 0.3338 | | 0.0146 | | 0.0463 | | 0.0007 | | 298 | | 73 | | 292 | 11 | 292 | 4 | 292 | 4 |
| S180601-43 | | 0.9 | | | 0.1584 | | 0.0034 | | 10.0344 | | 0.1276 | | 0.4594 | | 0.0051 | | 2439 | | 10 | | 2438 | 12 | 2437 | 22 | 2439 | 10 |
| S180601-45 | | 0.2 | | | 0.1601 | | 0.0037 | | 10.6320 | | 0.1633 | | 0.4816 | | 0.0059 | | 2457 | | 12 | | 2492 | 14 | 2534 | 25 | 2457 | 12 |
| S180601-46 | | 0.8 | | | 0.1665 | | 0.0035 | | 10.9924 | | 0.1253 | | 0.4790 | | 0.0050 | | 2522 | | 9 | | 2522 | 11 | 2523 | 22 | 2522 | 9 |
| S180601-47 | | 0.9 | | | 0.1605 | | 0.0036 | | 10.2730 | | 0.1459 | | 0.4643 | | 0.0054 | | 2461 | | 11 | | 2460 | 13 | 2458 | 24 | 2461 | 11 |
| S180601-48 | | 0.6 | | | 0.1686 | | 0.0040 | | 11.3948 | | 0.1865 | | 0.4901 | | 0.0063 | | 2544 | | 13 | | 2556 | 15 | 2571 | 27 | 2544 | 13 |
| S180601-53 | | 0.5 | | | 0.1667 | | 0.0042 | | 11.1382 | | 0.2110 | | 0.4846 | | 0.0068 | | 2525 | | 15 | | 2535 | 18 | 2547 | 29 | 2525 | 15 |
| S180601-54 | | 0.8 | | | 0.0525 | | 0.0046 | | 0.3727 | | 0.0315 | | 0.0515 | | 0.0012 | | 305 | | 150 | | 322 | 23 | 324 | 7 | 324 | 7 |
| S180601-56 | | 0.6 | | | 0.1676 | | 0.0039 | | 11.1693 | | 0.1822 | | 0.4833 | | 0.0061 | | 2534 | | 13 | | 2537 | 15 | 2541 | 27 | 2534 | 13 |
| S180601-58 | | 0.7 | | | 0.1544 | | 0.0033 | | 9.5672 | | 0.1248 | | 0.4495 | | 0.0050 | | 2395 | | 10 | | 2394 | 12 | 2393 | 22 | 2395 | 10 |
| S180601-59 | | 0.0 | | | 0.0523 | | 0.0015 | | 0.3331 | | 0.0074 | | 0.0462 | | 0.0005 | | 300 | | 31 | | 292 | 6 | 291 | 3 | 291 | 3 |
| S180601-60 | | 1.9 | | | 0.1522 | | 0.0035 | | 9.3268 | | 0.1418 | | 0.4445 | | 0.0053 | | 2370 | | 12 | | 2371 | 14 | 2371 | 24 | 2370 | 12 |
| S180601-61 | | 0.3 | | | 0.1574 | | 0.0034 | | 9.9346 | | 0.1346 | | 0.4578 | | 0.0052 | | 2428 | | 10 | | 2429 | 13 | 2430 | 23 | 2428 | 10 |
| S180601-62 | | 0.9 | | | 0.0531 | | 0.0043 | | 0.3745 | | 0.0290 | | 0.0512 | | 0.0011 | | 331 | | 138 | | 323 | 21 | 322 | 7 | 322 | 7 |
| S180601-63 | | 1.7 | | | 0.1626 | | 0.0040 | | 10.5340 | | 0.1950 | | 0.4699 | | 0.0064 | | 2483 | | 15 | | 2483 | 17 | 2483 | 28 | 2483 | 15 |
| S180601-64 | | 0.8 | | | 0.0527 | | 0.0025 | | 0.3583 | | 0.0158 | | 0.0494 | | 0.0007 | | 314 | | 74 | | 311 | 12 | 311 | 4 | 311 | 4 |
| S180601-65 | | 1.3 | | | 0.0525 | | 0.0031 | | 0.3541 | | 0.0198 | | 0.0489 | | 0.0008 | | 307 | | 97 | | 308 | 15 | 308 | 5 | 308 | 5 |
| S180601-66 | | 1.0 | | | 0.0530 | | 0.0032 | | 0.3744 | | 0.0210 | | 0.0513 | | 0.0009 | | 328 | | 97 | | 323 | 16 | 322 | 5 | 322 | 5 |
| S180601-67 | | 1.3 | | | 0.0521 | | 0.0017 | | 0.3577 | | 0.0098 | | 0.0498 | | 0.0006 | | 289 | | 41 | | 310 | 7 | 313 | 4 | 313 | 4 |
| S180601-69 | | 0.3 | | | 0.1615 | | 0.0036 | | 10.4084 | | 0.1536 | | 0.4674 | | 0.0056 | | 2471 | | 11 | | 2472 | 14 | 2472 | 24 | 2471 | 11 |
| S180601-70 | | 0.8 | | | 0.1594 | | 0.0033 | | 10.1726 | | 0.1150 | | 0.4628 | | 0.0048 | | 2449 | | 9 | | 2451 | 10 | 2452 | 21 | 2449 | 9 |
| S180601-72 | | 0.5 | | | 0.1644 | | 0.0038 | | 10.7778 | | 0.1720 | | 0.4753 | | 0.0059 | | 2502 | | 12 | | 2504 | 15 | 2507 | 26 | 2502 | 12 |
| S180601-73 | | 1.3 | | | 0.1622 | | 0.0046 | | 9.5437 | | 0.2232 | | 0.4267 | | 0.0068 | | 2479 | | 20 | | 2392 | 21 | 2291 | 31 | 2479 | 20 |
| S180601-74 | | 1.1 | | | 0.1581 | | 0.0048 | | 9.9800 | | 0.2626 | | 0.4578 | | 0.0080 | | 2435 | | 23 | | 2433 | 24 | 2430 | 35 | 2435 | 23 |
| S180601-75 | | 1.4 | | | 0.0565 | | 0.0027 | | 0.3432 | | 0.0152 | | 0.0441 | | 0.0007 | | 472 | | 72 | | 300 | 11 | 278 | 4 | 278 | 4 |
| S180601-76 | | 1.1 | | | 0.1718 | | 0.0051 | | 11.6377 | | 0.2948 | | 0.4912 | | 0.0086 | | 2575 | | 21 | | 2576 | 24 | 2576 | 37 | 2575 | 21 |
| S180601-77 | | 0.0 | | | 0.0518 | | 0.0013 | | 0.3240 | | 0.0061 | | 0.0453 | | 0.0005 | | 277 | | 24 | | 285 | 5 | 286 | 3 | 286 | 3 |
| S180601-79 | | 0.7 | | | 0.1614 | | 0.0045 | | 10.3917 | | 0.2402 | | 0.4669 | | 0.0074 | | 2470 | | 19 | | 2470 | 21 | 2470 | 33 | 2470 | 19 |
| S180601-80 | | 0.5 | | | 0.1605 | | 0.0046 | | 10.2827 | | 0.2470 | | 0.4647 | | 0.0076 | | 2460 | | 20 | | 2461 | 22 | 2460 | 33 | 2460 | 20 |
| S180601-82 | | 0.6 | | | 0.1532 | | 0.0034 | | 9.4353 | | 0.1364 | | 0.4465 | | 0.0052 | | 2382 | | 11 | | 2381 | 13 | 2380 | 23 | 2382 | 11 |
| S180601-83 | | 0.7 | | | 0.1581 | | 0.0035 | | 10.0177 | | 0.1443 | | 0.4595 | | 0.0054 | | 2435 | | 11 | | 2436 | 13 | 2437 | 24 | 2435 | 11 |
| S180601-85 | | 0.4 | | | 0.1587 | | 0.0034 | | 10.0933 | | 0.1375 | | 0.4611 | | 0.0053 | | 2442 | | 10 | | 2443 | 13 | 2444 | 23 | 2442 | 10 |
| S180601-86 | | 1.5 | | | 0.1823 | | 0.0080 | | 12.9063 | | 0.5585 | | 0.5134 | | 0.0146 | | 2674 | | 37 | | 2673 | 41 | 2671 | 62 | 2674 | 37 |
| S180601-87 | | 0.6 | | | 0.0634 | | 0.0015 | | 1.0369 | | 0.0171 | | 0.1185 | | 0.0013 | | 723 | | 18 | | 722 | 9 | 722 | 7 | 722 | 7 |
| S180601-88 | | 0.9 | | | 0.0519 | | 0.0027 | | 0.3337 | | 0.0158 | | 0.0466 | | 0.0007 | | 282 | | 81 | | 292 | 12 | 294 | 4 | 294 | 4 |
| S180601-89 | | 0.5 | | | 0.1655 | | 0.0037 | | 10.8726 | | 0.1629 | | 0.4764 | | 0.0058 | | 2512 | | 12 | | 2512 | 14 | 2511 | 25 | 2512 | 12 |
| S180601-90 | | 0.7 | | | 0.1576 | | 0.0035 | | 9.9489 | | 0.1456 | | 0.4578 | | 0.0054 | | 2430 | | 11 | | 2430 | 14 | 2430 | 24 | 2430 | 11 |
| S180601-91 | | 0.3 | | | 0.1616 | | 0.0033 | | 10.4227 | | 0.1138 | | 0.4676 | | 0.0048 | | 2472 | | 8 | | 2473 | 10 | 2473 | 21 | 2472 | 8 |
| S180601-92 | | 0.8 | | | 0.1496 | | 0.0035 | | 9.0515 | | 0.1485 | | 0.4386 | | 0.0055 | | 2342 | | 13 | | 2343 | 15 | 2344 | 25 | 2342 | 13 |
| S180601-93 | | 1.4 | | | 0.1641 | | 0.0050 | | 10.6918 | | 0.2852 | | 0.4725 | | 0.0085 | | 2498 | | 23 | | 2497 | 25 | 2494 | 37 | 2498 | 23 |
| S180601-94 | | 1.6 | | | 0.0562 | | 0.0034 | | 0.3395 | | 0.0194 | | 0.0438 | | 0.0008 | | 458 | | 96 | | 297 | 15 | 277 | 5 | 277 | 5 |
| S180601-95 | | 1.6 | | | 0.0522 | | 0.0021 | | 0.3391 | | 0.0121 | | 0.0471 | | 0.0006 | | 294 | | 57 | | 296 | 9 | 297 | 4 | 297 | 4 |
| S180601-96 | | 1.9 | | | 0.0518 | | 0.0017 | | 0.3281 | | 0.0088 | | 0.0459 | | 0.0005 | | 276 | | 40 | | 288 | 7 | 289 | 3 | 289 | 3 |
| S180601-97 | | 1.2 | | | 0.0520 | | 0.0023 | | 0.3383 | | 0.0135 | | 0.0472 | | 0.0006 | | 286 | | 67 | | 296 | 10 | 297 | 4 | 297 | 4 |
| S180601-98 | | 0.2 | | | 0.1562 | | 0.0032 | | 9.7873 | | 0.1167 | | 0.4544 | | 0.0049 | | 2415 | | 9 | | 2415 | 11 | 2415 | 21 | 2415 | 9 |
| S180601-99 | | 1.1 | | | 0.0518 | | 0.0026 | | 0.3115 | | 0.0142 | | 0.0436 | | 0.0006 | | 277 | | 77 | | 275 | 11 | 275 | 4 | 275 | 4 |
| S180601-100 | | 0.4 | | | 0.1622 | | 0.0033 | | 10.5033 | | 0.1183 | | 0.4694 | | 0.0049 | | 2479 | | 8 | | 2480 | 10 | 2481 | 22 | 2479 | 8 |
| S180601-102 | | 0.5 | | | 0.0520 | | 0.0028 | | 0.3220 | | 0.0163 | | 0.0449 | | 0.0007 | | 286 | | 86 | | 283 | 12 | 283 | 4 | 283 | 4 |
| S180601-103 | | 0.4 | | | 0.1592 | | 0.0040 | | 10.1488 | | 0.1954 | | 0.4622 | | 0.0065 | | 2447 | | 16 | | 2448 | 18 | 2449 | 28 | 2447 | 16 |
| S180601-104 | | 0.9 | | | 0.1588 | | 0.0068 | | 9.0332 | | 0.3698 | | 0.4124 | | 0.0104 | | 2442 | | 37 | | 2341 | 37 | 2226 | 47 | 2442 | 37 |
| S180601-105 | | 0.8 | | | 0.1588 | | 0.0036 | | 10.0934 | | 0.1603 | | 0.4608 | | 0.0057 | | 2443 | | 12 | | 2443 | 15 | 2443 | 25 | 2443 | 12 |
| S180601-106 | | 0.6 | | | 0.1561 | | 0.0033 | | 9.7716 | | 0.1271 | | 0.4539 | | 0.0050 | | 2413 | | 10 | | 2413 | 12 | 2412 | 22 | 2413 | 10 |
| S180601-107 | | 1.0 | | | 0.0517 | | 0.0029 | | 0.3116 | | 0.0165 | | 0.0436 | | 0.0007 | | 274 | | 94 | | 275 | 13 | 275 | 4 | 275 | 4 |
| S180601-108 | | 1.0 | | | 0.0520 | | 0.0034 | | 0.3209 | | 0.0197 | | 0.0447 | | 0.0008 | | 285 | | 108 | | 283 | 15 | 282 | 5 | 282 | 5 |
| S180601-109 | | 0.7 | | | 0.1409 | | 0.0037 | | 8.0850 | | 0.1697 | | 0.4159 | | 0.0060 | | 2238 | | 18 | | 2241 | 19 | 2242 | 27 | 2238 | 18 |
| S180601-110 | | 1.5 | | | 0.0517 | | 0.0021 | | 0.3108 | | 0.0110 | | 0.0436 | | 0.0006 | | 273 | | 58 | | 275 | 8 | 275 | 3 | 275 | 3 |
| S180601-111 | | 1.6 | | | 0.0519 | | 0.0018 | | 0.3066 | | 0.0087 | | 0.0428 | | 0.0005 | | 283 | | 43 | | 272 | 7 | 270 | 3 | 270 | 3 |
| S180601-114 | | 0.8 | | | 0.1531 | | 0.0032 | | 9.4541 | | 0.1191 | | 0.4475 | | 0.0049 | | 2381 | | 10 | | 2383 | 12 | 2384 | 22 | 2381 | 10 |
| S180601-115 | | 1.2 | | | 0.0528 | | 0.0022 | | 0.3730 | | 0.0136 | | 0.0512 | | 0.0007 | | 319 | | 59 | | 322 | 10 | 322 | 4 | 322 | 4 |
| S180601-116 | | 0.8 | | | 0.1552 | | 0.0035 | | 9.6956 | | 0.1525 | | 0.4526 | | 0.0056 | | 2404 | | 12 | | 2406 | 14 | 2407 | 25 | 2404 | 12 |
| S180601-117 | | 0.6 | | | 0.1281 | | 0.0027 | | 6.7096 | | 0.0827 | | 0.3797 | | 0.0040 | | 2072 | | 10 | | 2074 | 11 | 2075 | 19 | 2072 | 10 |
| S180601-118 | | 0.5 | | | 0.1411 | | 0.0031 | | 7.9396 | | 0.1125 | | 0.4076 | | 0.0047 | | 2241 | | 11 | | 2224 | 13 | 2204 | 21 | 2241 | 11 |
| S180601-119 | | 0.1 | | | 0.1473 | | 0.0031 | | 8.7895 | | 0.1156 | | 0.4325 | | 0.0048 | | 2315 | | 10 | | 2316 | 12 | 2317 | 22 | 2315 | 10 |
| S180601-120 | | 1.0 | | | 0.1593 | | 0.0041 | | 10.1474 | | 0.2046 | | 0.4616 | | 0.0067 | | 2448 | | 16 | | 2448 | 19 | 2446 | 29 | 2448 | 16 |
| S1306006 | | | | | | | | | | | | | | | | | | | | | | | | | | |
| S1310006-1 | 0.5 | | 0.0516 | | | 0.0026 | | 0.2996 | | 0.0130 | | 0.0421 | | 0.0009 | | 268 | | 110 | | 266 | | 10 | 266 | 5 | 266 | 5 |
| S1310006-2 | 0.8 | | 0.0522 | | | 0.0043 | | 0.3481 | | 0.0267 | | 0.0483 | | 0.0013 | | 296 | | 175 | | 303 | | 20 | 304 | 8 | 304 | 8 |
| S1310006-3 | 0.5 | | 0.1075 | | | 0.0047 | | 4.6450 | | 0.1731 | | 0.3134 | | 0.0074 | | 1757 | | 78 | | 1757 | | 31 | 1758 | 36 | 1757 | 78 |
| S1310006-4 | 0.9 | | 0.0521 | | | 0.0048 | | 0.3190 | | 0.0278 | | 0.0444 | | 0.0012 | | 292 | | 197 | | 281 | | 21 | 280 | 7 | 280 | 7 |
| S1310006-5 | 0.9 | | 0.1083 | | | 0.0037 | | 4.7454 | | 0.1167 | | 0.3177 | | 0.0064 | | 1771 | | 60 | | 1775 | | 21 | 1779 | 31 | 1771 | 60 |
| S1310006-6 | 0.6 | | 0.0542 | | | 0.0026 | | 0.4510 | | 0.0188 | | 0.0603 | | 0.0013 | | 379 | | 104 | | 378 | | 13 | 378 | 8 | 378 | 8 |
| S1310006-7 | 0.7 | | 0.0541 | | | 0.0019 | | 0.4584 | | 0.0120 | | 0.0614 | | 0.0012 | | 377 | | 77 | | 383 | | 8 | 384 | 7 | 384 | 7 |
| S1310006-8 | 0.6 | | 0.1640 | | | 0.0052 | | 10.7347 | | 0.2365 | | 0.4745 | | 0.0095 | | 2498 | | 53 | | 2500 | | 20 | 2503 | 41 | 2498 | 53 |
| S1310006-9 | 0.8 | | 0.1631 | | | 0.0050 | | 10.6155 | | 0.2127 | | 0.4720 | | 0.0091 | | 2488 | | 51 | | 2490 | | 19 | 2492 | 40 | 2488 | 51 |
| S1310006-10 | 1.9 | | 0.0511 | | | 0.0046 | | 0.2723 | | 0.0231 | | 0.0386 | | 0.0010 | | 246 | | 194 | | 245 | | 18 | 244 | 6 | 244 | 6 |
| S1310006-11 | 0.1 | | 0.1141 | | | 0.0035 | | 5.3539 | | 0.1064 | | 0.3402 | | 0.0065 | | 1866 | | 54 | | 1878 | | 17 | 1888 | 31 | 1866 | 54 |
| S1310006-12 | 1.3 | | 0.1646 | | | 0.0052 | | 10.7803 | | 0.2354 | | 0.4750 | | 0.0094 | | 2503 | | 53 | | 2504 | | 20 | 2506 | 41 | 2503 | 53 |
| S1310006-13 | 1.6 | | 0.0507 | | | 0.0061 | | 0.2804 | | 0.0325 | | 0.0401 | | 0.0013 | | 225 | | 257 | | 251 | | 26 | 254 | 8 | 254 | 8 |
| S1310006-14 | 0.1 | | 0.1307 | | | 0.0040 | | 6.9617 | | 0.1367 | | 0.3863 | | 0.0073 | | 2107 | | 53 | | 2107 | | 17 | 2106 | 34 | 2107 | 53 |
| S1310006-15 | 0.8 | | 0.0514 | | | 0.0028 | | 0.2828 | | 0.0138 | | 0.0399 | | 0.0009 | | 260 | | 122 | | 253 | | 11 | 252 | 5 | 252 | 5 |
| S1310006-16 | 0.3 | | 0.1518 | | | 0.0052 | | 9.2671 | | 0.2339 | | 0.4425 | | 0.0092 | | 2367 | | 57 | | 2365 | | 23 | 2362 | 41 | 2367 | 57 |
| S1310006-17 | 0.7 | | 0.1675 | | | 0.0053 | | 11.1118 | | 0.2323 | | 0.4811 | | 0.0094 | | 2533 | | 52 | | 2533 | | 19 | 2532 | 41 | 2533 | 52 |
| S1310006-18 | 1.1 | | 0.1639 | | | 0.0057 | | 10.6879 | | 0.2794 | | 0.4728 | | 0.0102 | | 2496 | | 57 | | 2496 | | 24 | 2496 | 44 | 2496 | 57 |
| S1310006-19 | 0.4 | | 0.1637 | | | 0.0050 | | 10.6768 | | 0.2096 | | 0.4730 | | 0.0090 | | 2494 | | 51 | | 2495 | | 18 | 2497 | 39 | 2494 | 51 |
| S1310006-20 | 1.0 | | 0.0518 | | | 0.0081 | | 0.3287 | | 0.0499 | | 0.0460 | | 0.0019 | | 278 | | 324 | | 289 | | 38 | 290 | 12 | 290 | 12 |
| S1310006-21 | 0.4 | | 0.1725 | | | 0.0054 | | 11.7146 | | 0.2383 | | 0.4925 | | 0.0095 | | 2582 | | 51 | | 2582 | | 19 | 2582 | 41 | 2582 | 51 |
| S1310006-22 | 0.5 | | 0.0512 | | | 0.0023 | | 0.2836 | | 0.0107 | | 0.0402 | | 0.0008 | | 249 | | 100 | | 254 | | 8 | 254 | 5 | 254 | 5 |
| S1310006-23 | 0.8 | | 0.0540 | | | 0.0049 | | 0.4484 | | 0.0386 | | 0.0602 | | 0.0017 | | 370 | | 193 | | 376 | | 27 | 377 | 10 | 377 | 10 |
| S1310006-24 | 0.5 | | 0.0511 | | | 0.0022 | | 0.2805 | | 0.0098 | | 0.0398 | | 0.0008 | | 244 | | 95 | | 251 | | 8 | 252 | 5 | 252 | 5 |
| S1310006-25 | 1.2 | | 0.0517 | | | 0.0054 | | 0.2897 | | 0.0289 | | 0.0407 | | 0.0012 | | 272 | | 223 | | 258 | | 23 | 257 | 7 | 257 | 7 |
| S1310006-26 | 1.5 | | 0.0505 | | | 0.0122 | | 0.2433 | | 0.0573 | | 0.0350 | | 0.0020 | | 216 | | 480 | | 221 | | 47 | 222 | 13 | 222 | 13 |
| S1310006-27 | 0.6 | | 0.0508 | | | 0.0033 | | 0.2761 | | 0.0163 | | 0.0394 | | 0.0009 | | 233 | | 143 | | 248 | | 13 | 249 | 6 | 249 | 6 |
| S1310006-28 | 0.5 | | 0.0530 | | | 0.0020 | | 0.3857 | | 0.0108 | | 0.0528 | | 0.0010 | | 329 | | 82 | | 331 | | 8 | 332 | 6 | 332 | 6 |
| S1310006-29 | 0.7 | | 0.1696 | | | 0.0054 | | 11.3744 | | 0.2350 | | 0.4865 | | 0.0094 | | 2554 | | 53 | | 2554 | | 19 | 2555 | 41 | 2554 | 53 |
| S1310006-30 | 0.3 | | 0.0528 | | | 0.0018 | | 0.3569 | | 0.0084 | | 0.0490 | | 0.0010 | | 321 | | 75 | | 310 | | 6 | 308 | 6 | 308 | 6 |
| S1310006-31 | 0.9 | | 0.0514 | | | 0.0018 | | 0.2987 | | 0.0078 | | 0.0422 | | 0.0008 | | 258 | | 80 | | 265 | | 6 | 266 | 5 | 266 | 5 |
| S1310006-32 | 1.0 | | 0.0528 | | | 0.0023 | | 0.3609 | | 0.0127 | | 0.0496 | | 0.0010 | | 319 | | 95 | | 313 | | 10 | 312 | 6 | 312 | 6 |
| S1310006-33 | 0.5 | | 0.0516 | | | 0.0021 | | 0.2839 | | 0.0094 | | 0.0399 | | 0.0008 | | 267 | | 92 | | 254 | | 7 | 252 | 5 | 252 | 5 |
| S1310006-34 | 0.1 | | 0.1324 | | | 0.0044 | | 6.5419 | | 0.1518 | | 0.3586 | | 0.0071 | | 2130 | | 57 | | 2052 | | 20 | 1975 | 34 | 2130 | 57 |
| S1310006-35 | 1.3 | | 0.0536 | | | 0.0026 | | 0.3038 | | 0.0128 | | 0.0411 | | 0.0009 | | 354 | | 107 | | 269 | | 10 | 260 | 5 | 260 | 5 |
| S1310006-36 | 0.4 | | 0.1134 | | | 0.0039 | | 4.7808 | | 0.1140 | | 0.3060 | | 0.0061 | | 1854 | | 60 | | 1782 | | 20 | 1721 | 30 | 1854 | 60 |
| S1310006-37 | 0.3 | | 0.1173 | | | 0.0038 | | 5.2113 | | 0.1093 | | 0.3223 | | 0.0062 | | 1916 | | 56 | | 1855 | | 18 | 1801 | 30 | 1916 | 56 |
| S1310006-38 | 0.7 | | 0.0537 | | | 0.0021 | | 0.3680 | | 0.0111 | | 0.0497 | | 0.0010 | | 359 | | 85 | | 318 | | 8 | 313 | 6 | 313 | 6 |
| S1310006-39 | 0.3 | | 0.1123 | | | 0.0037 | | 5.1063 | | 0.1183 | | 0.3301 | | 0.0065 | | 1836 | | 59 | | 1837 | | 20 | 1839 | 32 | 1836 | 59 |
| S1310006-40 | 0.3 | | 0.1100 | | | 0.0035 | | 4.8774 | | 0.1053 | | 0.3217 | | 0.0062 | | 1799 | | 57 | | 1798 | | 18 | 1798 | 30 | 1799 | 57 |
| S1310006-41 | 0.5 | | 0.0534 | | | 0.0019 | | 0.4014 | | 0.0105 | | 0.0545 | | 0.0011 | | 347 | | 78 | | 343 | | 8 | 342 | 6 | 342 | 6 |
| S1310006-42 | 0.7 | | 0.0516 | | | 0.0024 | | 0.2931 | | 0.0113 | | 0.0412 | | 0.0008 | | 267 | | 102 | | 261 | | 9 | 261 | 5 | 261 | 5 |
| S1310006-43 | 1.0 | | 0.0549 | | | 0.0018 | | 0.4886 | | 0.0112 | | 0.0646 | | 0.0012 | | 407 | | 72 | | 404 | | 8 | 404 | 7 | 404 | 7 |
| S1310006-44 | 1.0 | | 0.0514 | | | 0.0031 | | 0.3079 | | 0.0168 | | 0.0435 | | 0.0010 | | 257 | | 133 | | 273 | | 13 | 274 | 6 | 274 | 6 |
| S1310006-45 | 0.7 | | 0.1121 | | | 0.0035 | | 4.8172 | | 0.0980 | | 0.3117 | | 0.0059 | | 1834 | | 56 | | 1788 | | 17 | 1749 | 29 | 1834 | 56 |
| S1310006-46 | 0.1 | | 0.1161 | | | 0.0035 | | 5.4571 | | 0.1047 | | 0.3409 | | 0.0064 | | 1898 | | 54 | | 1894 | | 16 | 1891 | 31 | 1898 | 54 |
| S1310006-47 | 0.4 | | 0.1112 | | | 0.0039 | | 5.0898 | | 0.1338 | | 0.3322 | | 0.0068 | | 1819 | | 63 | | 1834 | | 22 | 1849 | 33 | 1819 | 63 |
| S1310006-48 | 0.7 | | 0.0510 | | | 0.0019 | | 0.2695 | | 0.0078 | | 0.0384 | | 0.0007 | | 239 | | 85 | | 242 | | 6 | 243 | 5 | 243 | 5 |
| S1310006-49 | 0.3 | | 0.1627 | | | 0.0049 | | 10.3160 | | 0.1993 | | 0.4600 | | 0.0087 | | 2484 | | 50 | | 2464 | | 18 | 2440 | 38 | 2484 | 50 |
| S1310006-50 | 0.6 | | 0.0578 | | | 0.0039 | | 0.3434 | | 0.0213 | | 0.0431 | | 0.0010 | | 522 | | 142 | | 300 | | 16 | 272 | 6 | 272 | 6 |
| S1310006-51 | 0.6 | | 0.0505 | | | 0.0047 | | 0.2816 | | 0.0251 | | 0.0404 | | 0.0011 | | 220 | | 204 | | 252 | | 20 | 255 | 7 | 255 | 7 |
| S1310006-52 | 0.6 | | 0.0536 | | | 0.0021 | | 0.4357 | | 0.0132 | | 0.0590 | | 0.0012 | | 352 | | 85 | | 367 | | 9 | 370 | 7 | 370 | 7 |
| S1310006-53 | 1.0 | | 0.0508 | | | 0.0029 | | 0.2518 | | 0.0126 | | 0.0360 | | 0.0008 | | 230 | | 125 | | 228 | | 10 | 228 | 5 | 228 | 5 |
| S1310006-54 | 0.5 | | 0.0527 | | | 0.0016 | | 0.3819 | | 0.0078 | | 0.0526 | | 0.0010 | | 315 | | 69 | | 328 | | 6 | 330 | 6 | 330 | 6 |
| S1310006-55 | 0.5 | | 0.1648 | | | 0.0049 | | 10.7819 | | 0.1986 | | 0.4741 | | 0.0088 | | 2506 | | 49 | | 2505 | | 17 | 2502 | 38 | 2506 | 49 |
| S1310006-56 | 0.7 | | 0.1618 | | | 0.0048 | | 10.4498 | | 0.1908 | | 0.4681 | | 0.0087 | | 2475 | | 49 | | 2476 | | 17 | 2475 | 38 | 2475 | 49 |
| S1310006-57 | 0.4 | | 0.1057 | | | 0.0032 | | 4.4844 | | 0.0858 | | 0.3074 | | 0.0057 | | 1727 | | 54 | | 1728 | | 16 | 1728 | 28 | 1727 | 54 |
| S1310006-58 | 0.9 | | 0.0509 | | | 0.0017 | | 0.2669 | | 0.0060 | | 0.0380 | | 0.0007 | | 236 | | 73 | | 240 | | 5 | 241 | 4 | 241 | 4 |
| S1306007 | | | | | | | | | | | | | | | | | | | | | | | | | | |
| S1306007-1 | 0.8 | | 0.0550 | | | 0.0028 | | 0.2484 | | 0.0121 | | 0.0327 | | 0.0008 | | 414 | | 110 | | 225 | | 10 | 208 | 5 | 208 | 5 |
| S1306007-2 | 0.6 | | 0.0540 | | | 0.0024 | | 0.2652 | | 0.0112 | | 0.0357 | | 0.0008 | | 369 | | 96 | | 239 | | 9 | 226 | 5 | 226 | 5 |
| S1306007-3 | 0.9 | | 0.0498 | | | 0.0053 | | 0.2541 | | 0.0241 | | 0.0361 | | 0.0009 | | 183 | | 230 | | 230 | | 20 | 229 | 6 | 229 | 6 |
| S1306007-4 | 0.9 | | 0.0509 | | | 0.0034 | | 0.2584 | | 0.0167 | | 0.0368 | | 0.0009 | | 236 | | 147 | | 233 | | 13 | 233 | 6 | 233 | 6 |
| S1306007-5 | 0.9 | | 0.0510 | | | 0.0044 | | 0.2587 | | 0.0195 | | 0.0372 | | 0.0008 | | 243 | | 200 | | 234 | | 16 | 235 | 5 | 235 | 5 |
| S1306007-6 | 0.8 | | 0.0512 | | | 0.0046 | | 0.2616 | | 0.0214 | | 0.0374 | | 0.0009 | | 250 | | 211 | | 236 | | 17 | 236 | 6 | 236 | 6 |
| S1306007-7 | 1.1 | | 0.0504 | | | 0.0028 | | 0.2605 | | 0.0139 | | 0.0375 | | 0.0009 | | 214 | | 124 | | 235 | | 11 | 237 | 5 | 237 | 5 |
| S1306007-8 | 0.9 | | 0.0510 | | | 0.0056 | | 0.2618 | | 0.0245 | | 0.0376 | | 0.0011 | | 239 | | 237 | | 236 | | 20 | 238 | 7 | 238 | 7 |
| S1306007-9 | 0.6 | | 0.0514 | | | 0.0052 | | 0.2670 | | 0.0214 | | 0.0376 | | 0.0010 | | 261 | | 231 | | 240 | | 17 | 238 | 6 | 238 | 6 |
| S1306007-10 | 0.8 | | 0.0617 | | | 0.0129 | | 0.2930 | | 0.0379 | | 0.0386 | | 0.0016 | | 665 | | 429 | | 261 | | 30 | 244 | 10 | 244 | 10 |
| S1306007-11 | 0.7 | | 0.0527 | | | 0.0069 | | 0.2702 | | 0.0314 | | 0.0386 | | 0.0014 | | 317 | | 274 | | 243 | | 25 | 244 | 9 | 244 | 9 |
| S1306007-12 | 1.0 | | 0.0529 | | | 0.0083 | | 0.2822 | | 0.0348 | | 0.0402 | | 0.0014 | | 324 | | 331 | | 252 | | 28 | 254 | 8 | 254 | 8 |
| S1306007-13 | 1.0 | | 0.0550 | | | 0.0072 | | 0.2996 | | 0.0340 | | 0.0407 | | 0.0017 | | 413 | | 292 | | 266 | | 27 | 257 | 11 | 257 | 11 |
| S1306007-14 | 0.6 | | 0.0519 | | | 0.0031 | | 0.3009 | | 0.0165 | | 0.0408 | | 0.0007 | | 283 | | 135 | | 267 | | 13 | 258 | 4 | 258 | 4 |
| S1306007-15 | 0.5 | | 0.0507 | | | 0.0025 | | 0.2939 | | 0.0136 | | 0.0421 | | 0.0009 | | 226 | | 108 | | 262 | | 11 | 266 | 6 | 266 | 6 |
| S1306007-16 | 0.9 | | 0.0510 | | | 0.0059 | | 0.2986 | | 0.0332 | | 0.0424 | | 0.0016 | | 243 | | 246 | | 265 | | 26 | 268 | 10 | 268 | 10 |
| S1306007-17 | 0.6 | | 0.0516 | | | 0.0036 | | 0.3102 | | 0.0198 | | 0.0432 | | 0.0008 | | 265 | | 159 | | 274 | | 15 | 272 | 5 | 272 | 5 |
| S1306007-18 | 0.4 | | 0.0520 | | | 0.0040 | | 0.3101 | | 0.0220 | | 0.0434 | | 0.0009 | | 287 | | 176 | | 274 | | 17 | 274 | 6 | 274 | 6 |
| S1306007-19 | 0.3 | | 0.0605 | | | 0.0017 | | 0.3825 | | 0.0102 | | 0.0459 | | 0.0009 | | 620 | | 60 | | 329 | | 7 | 289 | 5 | 289 | 5 |
| S1306007-20 | 0.5 | | 0.0527 | | | 0.0019 | | 0.3544 | | 0.0119 | | 0.0488 | | 0.0010 | | 317 | | 78 | | 308 | | 9 | 307 | 6 | 307 | 6 |
| S1306007-21 | 0.8 | | 0.0537 | | | 0.0053 | | 0.3736 | | 0.0333 | | 0.0509 | | 0.0013 | | 367 | | 222 | | 322 | | 25 | 320 | 8 | 320 | 8 |
| S1306007-22 | 1.0 | | 0.0537 | | | 0.0038 | | 0.4169 | | 0.0286 | | 0.0563 | | 0.0015 | | 359 | | 153 | | 354 | | 20 | 353 | 9 | 353 | 9 |
| S1306007-23 | 0.9 | | 0.0541 | | | 0.0038 | | 0.4397 | | 0.0294 | | 0.0590 | | 0.0015 | | 375 | | 149 | | 370 | | 21 | 369 | 9 | 369 | 9 |
| S1306007-24 | 0.9 | | 0.0552 | | | 0.0072 | | 0.4377 | | 0.0383 | | 0.0590 | | 0.0018 | | 420 | | 294 | | 369 | | 27 | 370 | 11 | 370 | 11 |
| S1306007-25 | 0.9 | | 0.0543 | | | 0.0021 | | 0.4984 | | 0.0188 | | 0.0666 | | 0.0014 | | 383 | | 85 | | 411 | | 13 | 416 | 8 | 416 | 8 |
| S1306007-26 | 0.4 | | 0.0674 | | | 0.0046 | | 1.1143 | | 0.0732 | | 0.1157 | | 0.0025 | | 850 | | 142 | | 760 | | 35 | 706 | 15 | 706 | 15 |
| S1306007-27 | 0.6 | | 0.0630 | | | 0.0023 | | 1.0821 | | 0.0392 | | 0.1223 | | 0.0015 | | 709 | | 80 | | 745 | | 19 | 744 | 9 | 744 | 9 |
| S1306007-28 | 1.0 | | 0.0626 | | | 0.0043 | | 1.1166 | | 0.0778 | | 0.1253 | | 0.0029 | | 694 | | 146 | | 761 | | 37 | 761 | 16 | 761 | 16 |
| S1306007-29 | 0.5 | | 0.0650 | | | 0.0018 | | 1.1255 | | 0.0300 | | 0.1256 | | 0.0025 | | 774 | | 58 | | 766 | | 14 | 763 | 14 | 763 | 14 |
| S1306007-30 | 0.3 | | 0.0733 | | | 0.0045 | | 1.5725 | | 0.0911 | | 0.1497 | | 0.0030 | | 1033 | | 125 | | 959 | | 36 | 899 | 17 | 899 | 17 |
| S1306007-31 | 1.6 | | 0.1074 | | | 0.0052 | | 4.6185 | | 0.2124 | | 0.3120 | | 0.0092 | | 1755 | | 86 | | 1753 | | 38 | 1751 | 45 | 1755 | 86 |
| S1306007-32 | 0.1 | | 0.1082 | | | 0.0063 | | 4.9954 | | 0.2866 | | 0.3259 | | 0.0101 | | 1770 | | 105 | | 1819 | | 49 | 1818 | 49 | 1770 | 105 |
| S1306007-33 | 0.7 | | 0.1105 | | | 0.0058 | | 5.2192 | | 0.2552 | | 0.3334 | | 0.0064 | | 1809 | | 96 | | 1856 | | 42 | 1855 | 31 | 1809 | 96 |
| S1306007-34 | 1.3 | | 0.1413 | | | 0.0029 | | 8.0952 | | 0.1574 | | 0.4156 | | 0.0084 | | 2243 | | 35 | | 2242 | | 18 | 2240 | 38 | 2243 | 35 |
| S1306007-35 | 1.5 | | 0.1553 | | | 0.0083 | | 10.4728 | | 0.5220 | | 0.4801 | | 0.0122 | | 2406 | | 85 | | 2478 | | 46 | 2528 | 53 | 2406 | 85 |
| S1306007-36 | 0.9 | | 0.1568 | | | 0.0031 | | 9.8593 | | 0.1838 | | 0.4562 | | 0.0093 | | 2421 | | 33 | | 2422 | | 17 | 2423 | 41 | 2421 | 33 |
| S1306007-37 | 0.7 | | 0.1590 | | | 0.0026 | | 10.1040 | | 0.1501 | | 0.4609 | | 0.0088 | | 2445 | | 27 | | 2444 | | 14 | 2443 | 39 | 2445 | 27 |
| S1306007-38 | 0.5 | | 0.1603 | | | 0.0067 | | 10.9261 | | 0.4629 | | 0.4867 | | 0.0082 | | 2459 | | 70 | | 2517 | | 39 | 2556 | 36 | 2459 | 70 |
| S1306007-39 | 0.6 | | 0.1615 | | | 0.0060 | | 10.7580 | | 0.3727 | | 0.4747 | | 0.0078 | | 2472 | | 62 | | 2502 | | 32 | 2504 | 34 | 2472 | 62 |
| S1306007-40 | 1.0 | | 0.1616 | | | 0.0051 | | 10.6252 | | 0.3216 | | 0.4688 | | 0.0059 | | 2473 | | 53 | | 2491 | | 28 | 2478 | 26 | 2473 | 53 |
| S1306007-41 | 0.8 | | 0.1617 | | | 0.0020 | | 9.6398 | | 0.1064 | | 0.4323 | | 0.0077 | | 2474 | | 21 | | 2401 | | 10 | 2316 | 35 | 2474 | 21 |
| S1306007-42 | 0.8 | | 0.1633 | | | 0.0062 | | 10.5824 | | 0.3828 | | 0.4702 | | 0.0138 | | 2490 | | 62 | | 2487 | | 34 | 2484 | 61 | 2490 | 62 |
| S1306007-43 | 1.2 | | 0.1661 | | | 0.0055 | | 11.1916 | | 0.3820 | | 0.4824 | | 0.0086 | | 2518 | | 56 | | 2539 | | 32 | 2538 | 37 | 2518 | 56 |
| S1306007-44 | 0.2 | | 0.1675 | | | 0.0077 | | 10.5597 | | 0.4567 | | 0.4436 | | 0.0074 | | 2532 | | 78 | | 2485 | | 40 | 2367 | 33 | 2532 | 78 |
| S1306007-45 | 0.4 | | 0.1679 | | | 0.0030 | | 10.2722 | | 0.1726 | | 0.4438 | | 0.0088 | | 2537 | | 30 | | 2460 | | 16 | 2368 | 39 | 2537 | 30 |
| S1306007-46 | 1.0 | | 0.1680 | | | 0.0028 | | 10.7368 | | 0.1672 | | 0.4637 | | 0.0090 | | 2537 | | 28 | | 2501 | | 14 | 2456 | 39 | 2537 | 28 |
| S1306007-47 | 0.6 | | 0.1690 | | | 0.0071 | | 11.6593 | | 0.4572 | | 0.4906 | | 0.0076 | | 2548 | | 70 | | 2577 | | 37 | 2573 | 33 | 2548 | 70 |
| S1306007-48 | 0.6 | | 0.1728 | | | 0.0097 | | 13.3960 | | 0.7012 | | 0.5479 | | 0.0121 | | 2585 | | 94 | | 2708 | | 49 | 2817 | 51 | 2585 | 94 |
| S1306007-49 | 1.2 | | 0.0520 | | | 0.0010 | | 0.3078 | | 0.0057 | | 0.0429 | | 0.0008 | | 287 | | 44 | | 273 | | 4 | 271 | 5 | 271 | 5 |
| S1306007-50 | 1.1 | | 0.1125 | | | 0.0037 | | 4.6905 | | 0.1477 | | 0.3024 | | 0.0076 | | 1840 | | 58 | | 1766 | | 26 | 1703 | 38 | 1840 | 58 |
| S1306007-51 | 0.8 | | 0.1648 | | | 0.0022 | | 10.8029 | | 0.1410 | | 0.4755 | | 0.0093 | | 2505 | | 23 | | 2506 | | 12 | 2508 | 40 | 2505 | 23 |
| S1306007-52 | 1.0 | | 0.0585 | | | 0.0012 | | 0.4059 | | 0.0077 | | 0.0503 | | 0.0010 | | 548 | | 43 | | 346 | | 6 | 317 | 6 | 317 | 6 |
| S1306007-53 | 1.2 | | 0.0514 | | | 0.0016 | | 0.2951 | | 0.0089 | | 0.0417 | | 0.0009 | | 258 | | 71 | | 263 | | 7 | 263 | 5 | 263 | 5 |
| S1306007-54 | 1.9 | | 0.1658 | | | 0.0020 | | 10.8881 | | 0.1203 | | 0.4763 | | 0.0090 | | 2516 | | 20 | | 2514 | | 10 | 2511 | 39 | 2516 | 20 |
| S1306007-55 | 1.6 | | 0.0569 | | | 0.0018 | | 0.3224 | | 0.0099 | | 0.0411 | | 0.0009 | | 488 | | 71 | | 284 | | 8 | 260 | 5 | 260 | 5 |
| S1306007-56 | 2.0 | | 0.1676 | | | 0.0023 | | 10.2077 | | 0.1352 | | 0.4416 | | 0.0086 | | 2534 | | 23 | | 2454 | | 12 | 2358 | 38 | 2534 | 23 |
| S1306007-57 | 1.2 | | 0.1151 | | | 0.0037 | | 4.7741 | | 0.1471 | | 0.3008 | | 0.0075 | | 1882 | | 57 | | 1780 | | 26 | 1695 | 37 | 1882 | 57 |
| S1306007-58 | 0.9 | | 0.1523 | | | 0.0016 | | 9.3628 | | 0.0893 | | 0.4458 | | 0.0082 | | 2372 | | 18 | | 2374 | | 9 | 2376 | 36 | 2372 | 18 |
| S1306007-59 | 1.0 | | 0.0552 | | | 0.0014 | | 0.2665 | | 0.0064 | | 0.0350 | | 0.0007 | | 419 | | 55 | | 240 | | 5 | 222 | 4 | 222 | 4 |
| S1306007-60 | 1.7 | | 0.0548 | | | 0.0014 | | 0.3272 | | 0.0081 | | 0.0433 | | 0.0009 | | 404 | | 57 | | 287 | | 6 | 273 | 5 | 273 | 5 |
| S1306007-61 | 1.5 | | 0.1624 | | | 0.0028 | | 9.7476 | | 0.1599 | | 0.4352 | | 0.0089 | | 2481 | | 28 | | 2411 | | 15 | 2329 | 40 | 2481 | 28 |
| S1306007-62 | 2.2 | | 0.1198 | | | 0.0024 | | 5.8223 | | 0.1106 | | 0.3524 | | 0.0073 | | 1953 | | 35 | | 1950 | | 16 | 1946 | 35 | 1953 | 35 |
| S1306007-63 | 1.7 | | 0.1130 | | | 0.0015 | | 4.8806 | | 0.0616 | | 0.3132 | | 0.0059 | | 1849 | | 24 | | 1799 | | 11 | 1756 | 29 | 1849 | 24 |
| S1306007-64 | 1.7 | | 0.1655 | | | 0.0017 | | 10.8294 | | 0.1040 | | 0.4744 | | 0.0087 | | 2513 | | 18 | | 2509 | | 9 | 2503 | 38 | 2513 | 18 |
| S1306007-65 | 0.9 | | 0.1620 | | | 0.0019 | | 10.4900 | | 0.1164 | | 0.4695 | | 0.0087 | | 2477 | | 20 | | 2479 | | 10 | 2481 | 38 | 2477 | 20 |
| S1306007-66 | 3.2 | | 0.1139 | | | 0.0012 | | 4.6382 | | 0.0462 | | 0.2954 | | 0.0054 | | 1862 | | 20 | | 1756 | | 8 | 1668 | 27 | 1862 | 20 |
| S1306007-67 | 1.5 | | 0.1605 | | | 0.0022 | | 9.3798 | | 0.1192 | | 0.4238 | | 0.0081 | | 2461 | | 23 | | 2376 | | 12 | 2278 | 37 | 2461 | 23 |
| S1306007-68 | 1.7 | | 0.1696 | | | 0.0025 | | 10.3032 | | 0.1456 | | 0.4407 | | 0.0086 | | 2553 | | 25 | | 2462 | | 13 | 2354 | 39 | 2553 | 25 |
| S1306007-69 | 2.0 | | 0.1179 | | | 0.0015 | | 4.9198 | | 0.0557 | | 0.3027 | | 0.0056 | | 1924 | | 22 | | 1806 | | 10 | 1705 | 28 | 1924 | 22 |
| S1306007-70 | 4.2 | | 0.1117 | | | 0.0015 | | 4.6958 | | 0.0574 | | 0.3050 | | 0.0058 | | 1827 | | 23 | | 1767 | | 10 | 1716 | 28 | 1827 | 23 |
| S1306007-71 | 1.4 | | 0.1624 | | | 0.0017 | | 10.7434 | | 0.1063 | | 0.4798 | | 0.0089 | | 2481 | | 18 | | 2501 | | 9 | 2526 | 39 | 2481 | 18 |
| S1306007-72 | 0.9 | | 0.1632 | | | 0.0025 | | 9.3596 | | 0.1350 | | 0.4159 | | 0.0083 | | 2489 | | 25 | | 2374 | | 13 | 2242 | 38 | 2489 | 25 |
| S1306007-73 | 1.7 | | 0.1581 | | | 0.0022 | | 8.4861 | | 0.1095 | | 0.3894 | | 0.0075 | | 2435 | | 23 | | 2284 | | 12 | 2120 | 35 | 2120 | 35 |
| S1306007-74 | 1.3 | | 0.1637 | | | 0.0020 | | 10.3608 | | 0.1174 | | 0.4592 | | 0.0086 | | 2494 | | 20 | | 2468 | | 10 | 2436 | 38 | 2494 | 20 |
| S1306007-75 | 2.9 | | 0.1619 | | | 0.0018 | | 9.1331 | | 0.0944 | | 0.4093 | | 0.0076 | | 2475 | | 19 | | 2351 | | 9 | 2212 | 35 | 2475 | 19 |
| S1306007-76 | 0.7 | | 0.1605 | | | 0.0020 | | 9.0822 | | 0.1030 | | 0.4103 | | 0.0077 | | 2461 | | 20 | | 2346 | | 10 | 2216 | 35 | 2461 | 20 |
| S1306007-77 | 1.6 | | 0.0609 | | | 0.0017 | | 0.4646 | | 0.0123 | | 0.0553 | | 0.0011 | | 637 | | 59 | | 388 | | 9 | 347 | 7 | 347 | 7 |
| S1306007-78 | 1.8 | | 0.0578 | | | 0.0022 | | 0.3570 | | 0.0130 | | 0.0448 | | 0.0010 | | 522 | | 82 | | 310 | | 10 | 283 | 6 | 283 | 6 |
| S1306007-79 | 1.4 | | 0.0566 | | | 0.0012 | | 0.3382 | | 0.0065 | | 0.0433 | | 0.0008 | | 477 | | 45 | | 296 | | 5 | 273 | 5 | 273 | 5 |
| S1306007-80 | 1.4 | | 0.0523 | | | 0.0014 | | 0.2938 | | 0.0076 | | 0.0407 | | 0.0008 | | 300 | | 61 | | 262 | | 6 | 257 | 5 | 257 | 5 |
|  | | | | | | | | | | | | | | | | | | | | | | | | | | |
| LY150803-1 |  | | 0.1436 | | | 0.0031 | | 7.7172 | | 0.1059 | | 0.3897 | | 0.0046 | | 2271 | | 11 | | 2199 | | 12 | 2121 | 21 | 2271 | 11 |
| LY150803-2 |  | | 0.0519 | | | 0.0030 | | 0.2960 | | 0.0160 | | 0.0413 | | 0.0007 | | 283 | | 93 | | 263 | | 13 | 261 | 4 | 261 | 4 |
| LY150803-3 |  | | 0.0496 | | | 0.0021 | | 0.1852 | | 0.0069 | | 0.0271 | | 0.0004 | | 178 | | 61 | | 173 | | 6 | 172 | 2 | 172 | 2 |
| LY150803-4 |  | | 0.0524 | | | 0.0058 | | 0.3536 | | 0.0385 | | 0.0490 | | 0.0011 | | 302 | | 204 | | 307 | | 29 | 308 | 7 | 308 | 7 |
| LY150803-5 |  | | 0.1612 | | | 0.0040 | | 10.2905 | | 0.1917 | | 0.4629 | | 0.0065 | | 2469 | | 15 | | 2461 | | 17 | 2452 | 29 | 2469 | 15 |
| LY150803-6 |  | | 0.0553 | | | 0.0032 | | 0.2846 | | 0.0155 | | 0.0373 | | 0.0006 | | 425 | | 93 | | 254 | | 12 | 236 | 4 | 236 | 4 |
| LY150803-7 |  | | 0.0491 | | | 0.0017 | | 0.1800 | | 0.0052 | | 0.0266 | | 0.0003 | | 153 | | 44 | | 168 | | 4 | 169 | 2 | 169 | 2 |
| LY150803-8 |  | | 0.0514 | | | 0.0015 | | 0.2699 | | 0.0065 | | 0.0381 | | 0.0005 | | 257 | | 34 | | 243 | | 5 | 241 | 3 | 241 | 3 |
| LY150803-9 |  | | 0.0519 | | | 0.0016 | | 0.3037 | | 0.0077 | | 0.0425 | | 0.0005 | | 280 | | 36 | | 269 | | 6 | 268 | 3 | 268 | 3 |
| LY150803-10 |  | | 0.0496 | | | 0.0044 | | 0.1683 | | 0.0143 | | 0.0246 | | 0.0005 | | 177 | | 151 | | 158 | | 12 | 157 | 3 | 157 | 3 |
| LY150803-11 |  | | 0.0508 | | | 0.0016 | | 0.2457 | | 0.0062 | | 0.0351 | | 0.0004 | | 231 | | 36 | | 223 | | 5 | 222 | 3 | 222 | 3 |
| LY150803-12 |  | | 0.0525 | | | 0.0030 | | 0.2149 | | 0.0113 | | 0.0297 | | 0.0005 | | 306 | | 90 | | 198 | | 9 | 189 | 3 | 189 | 3 |
| LY150803-13 |  | | 0.0495 | | | 0.0015 | | 0.2028 | | 0.0048 | | 0.0297 | | 0.0004 | | 172 | | 33 | | 187 | | 4 | 189 | 2 | 189 | 2 |
| LY150803-14 |  | | 0.0507 | | | 0.0027 | | 0.2473 | | 0.0121 | | 0.0354 | | 0.0005 | | 228 | | 85 | | 224 | | 10 | 224 | 3 | 224 | 3 |
| LY150803-15 |  | | 0.0507 | | | 0.0030 | | 0.2467 | | 0.0137 | | 0.0353 | | 0.0006 | | 225 | | 97 | | 224 | | 11 | 224 | 4 | 224 | 4 |
| LY150803-16 |  | | 0.0534 | | | 0.0024 | | 0.3677 | | 0.0152 | | 0.0499 | | 0.0007 | | 346 | | 67 | | 318 | | 11 | 314 | 4 | 314 | 4 |
| LY150803-17 |  | | 0.0530 | | | 0.0032 | | 0.3845 | | 0.0221 | | 0.0526 | | 0.0009 | | 328 | | 100 | | 330 | | 16 | 331 | 5 | 331 | 5 |
| LY150803-18 |  | | 0.0495 | | | 0.0033 | | 0.1833 | | 0.0115 | | 0.0268 | | 0.0005 | | 173 | | 109 | | 171 | | 10 | 171 | 3 | 171 | 3 |
| LY150803-19 |  | | 0.0500 | | | 0.0027 | | 0.2007 | | 0.0102 | | 0.0291 | | 0.0005 | | 194 | | 89 | | 186 | | 9 | 185 | 3 | 185 | 3 |
| LY150803-20 |  | | 0.0508 | | | 0.0035 | | 0.2367 | | 0.0156 | | 0.0338 | | 0.0006 | | 230 | | 118 | | 216 | | 13 | 214 | 4 | 214 | 4 |
| LY150803-21 |  | | 0.1080 | | | 0.0032 | | 4.6851 | | 0.1140 | | 0.3146 | | 0.0046 | | 1766 | | 24 | | 1765 | | 20 | 1763 | 22 | 1766 | 24 |
| LY150803-22 |  | | 0.1057 | | | 0.0030 | | 4.4713 | | 0.1044 | | 0.3068 | | 0.0043 | | 1727 | | 23 | | 1726 | | 19 | 1725 | 21 | 1727 | 23 |
| LY150803-23 |  | | 0.0511 | | | 0.0027 | | 0.2806 | | 0.0140 | | 0.0398 | | 0.0006 | | 246 | | 86 | | 251 | | 11 | 252 | 4 | 252 | 4 |
| LY150803-24 |  | | 0.0525 | | | 0.0031 | | 0.3641 | | 0.0205 | | 0.0503 | | 0.0008 | | 306 | | 98 | | 315 | | 15 | 317 | 5 | 317 | 5 |
| LY150803-25 |  | | 0.0500 | | | 0.0037 | | 0.1958 | | 0.0137 | | 0.0284 | | 0.0005 | | 193 | | 124 | | 182 | | 12 | 181 | 3 | 181 | 3 |
| LY150803-26 |  | | 0.0504 | | | 0.0017 | | 0.1841 | | 0.0054 | | 0.0265 | | 0.0003 | | 214 | | 45 | | 172 | | 5 | 168 | 2 | 168 | 2 |
| LY150803-27 |  | | 0.0495 | | | 0.0020 | | 0.1983 | | 0.0070 | | 0.0291 | | 0.0004 | | 170 | | 58 | | 184 | | 6 | 185 | 2 | 185 | 2 |
| LY150803-28 |  | | 0.0493 | | | 0.0022 | | 0.1824 | | 0.0076 | | 0.0268 | | 0.0004 | | 160 | | 71 | | 170 | | 7 | 171 | 2 | 171 | 2 |
| LY150803-29 |  | | 0.0532 | | | 0.0020 | | 0.4044 | | 0.0131 | | 0.0551 | | 0.0007 | | 337 | | 50 | | 345 | | 9 | 346 | 4 | 346 | 4 |
| LY150803-30 |  | | 0.0493 | | | 0.0015 | | 0.1873 | | 0.0048 | | 0.0276 | | 0.0003 | | 160 | | 38 | | 174 | | 4 | 175 | 2 | 175 | 2 |
| LY150803-31 |  | | 0.1054 | | | 0.0025 | | 4.4527 | | 0.0729 | | 0.3065 | | 0.0037 | | 1721 | | 14 | | 1722 | | 14 | 1723 | 18 | 1721 | 14 |
| LY150803-32 |  | | 0.0498 | | | 0.0026 | | 0.2052 | | 0.0098 | | 0.0299 | | 0.0005 | | 184 | | 82 | | 190 | | 8 | 190 | 3 | 190 | 3 |
| LY150803-33 |  | | 0.0493 | | | 0.0022 | | 0.2024 | | 0.0081 | | 0.0298 | | 0.0004 | | 160 | | 68 | | 187 | | 7 | 189 | 3 | 189 | 3 |
| LY150803-34 |  | | 0.0499 | | | 0.0020 | | 0.1917 | | 0.0070 | | 0.0279 | | 0.0004 | | 189 | | 60 | | 178 | | 6 | 177 | 2 | 177 | 2 |
| LY150803-35 |  | | 0.0511 | | | 0.0040 | | 0.2685 | | 0.0202 | | 0.0381 | | 0.0008 | | 246 | | 133 | | 242 | | 16 | 241 | 5 | 241 | 5 |
| LY150803-36 |  | | 0.0505 | | | 0.0026 | | 0.2557 | | 0.0122 | | 0.0367 | | 0.0005 | | 217 | | 84 | | 231 | | 10 | 233 | 3 | 233 | 3 |
| LY150803-37 |  | | 0.0524 | | | 0.0023 | | 0.3424 | | 0.0133 | | 0.0474 | | 0.0007 | | 303 | | 63 | | 299 | | 10 | 298 | 4 | 298 | 4 |
| LY150803-38 |  | | 0.1077 | | | 0.0034 | | 4.6768 | | 0.1254 | | 0.3148 | | 0.0048 | | 1761 | | 27 | | 1763 | | 22 | 1764 | 24 | 1761 | 27 |
| LY150803-39 |  | | 0.0509 | | | 0.0019 | | 0.2491 | | 0.0079 | | 0.0355 | | 0.0005 | | 235 | | 49 | | 226 | | 6 | 225 | 3 | 225 | 3 |
| LY150803-40 |  | | 0.1031 | | | 0.0034 | | 4.2265 | | 0.1187 | | 0.2973 | | 0.0047 | | 1680 | | 29 | | 1679 | | 23 | 1678 | 23 | 1680 | 29 |
| LY150803-41 |  | | 0.0532 | | | 0.0019 | | 0.3833 | | 0.0120 | | 0.0523 | | 0.0007 | | 337 | | 48 | | 329 | | 9 | 328 | 4 | 328 | 4 |
| LY150803-42 |  | | 0.0494 | | | 0.0030 | | 0.1901 | | 0.0109 | | 0.0279 | | 0.0005 | | 167 | | 100 | | 177 | | 9 | 177 | 3 | 177 | 3 |
| LY150803-43 |  | | 0.0512 | | | 0.0019 | | 0.2575 | | 0.0085 | | 0.0365 | | 0.0005 | | 249 | | 52 | | 233 | | 7 | 231 | 3 | 231 | 3 |
| LY150803-44 |  | | 0.1062 | | | 0.0026 | | 4.5228 | | 0.0813 | | 0.3088 | | 0.0039 | | 1736 | | 16 | | 1735 | | 15 | 1735 | 19 | 1736 | 16 |
| LY150803-45 |  | | 0.0491 | | | 0.0032 | | 0.1853 | | 0.0114 | | 0.0274 | | 0.0004 | | 155 | | 109 | | 173 | | 10 | 174 | 3 | 174 | 3 |
| LY150803-46 |  | | 0.0513 | | | 0.0017 | | 0.2937 | | 0.0082 | | 0.0416 | | 0.0005 | | 252 | | 41 | | 261 | | 6 | 262 | 3 | 262 | 3 |
| LY150803-47 |  | | 0.0501 | | | 0.0017 | | 0.2009 | | 0.0059 | | 0.0291 | | 0.0004 | | 201 | | 45 | | 186 | | 5 | 185 | 2 | 185 | 2 |
| LY150803-48 |  | | 0.0511 | | | 0.0016 | | 0.2638 | | 0.0066 | | 0.0375 | | 0.0005 | | 244 | | 36 | | 238 | | 5 | 237 | 3 | 237 | 3 |
| LY150803-49 |  | | 0.0493 | | | 0.0018 | | 0.2013 | | 0.0063 | | 0.0296 | | 0.0004 | | 164 | | 50 | | 186 | | 5 | 188 | 2 | 188 | 2 |
| LY150803-50 |  | | 0.0524 | | | 0.0019 | | 0.3380 | | 0.0105 | | 0.0468 | | 0.0006 | | 302 | | 47 | | 296 | | 8 | 295 | 4 | 295 | 4 |
| LY150803-51 |  | | 0.0526 | | | 0.0015 | | 0.3486 | | 0.0078 | | 0.0481 | | 0.0006 | | 309 | | 30 | | 304 | | 6 | 303 | 4 | 303 | 4 |
| LY150803-52 |  | | 0.0494 | | | 0.0065 | | 0.1712 | | 0.0218 | | 0.0251 | | 0.0008 | | 167 | | 226 | | 160 | | 19 | 160 | 5 | 160 | 5 |
| LY150803-54 |  | | 0.0541 | | | 0.0036 | | 0.2045 | | 0.0128 | | 0.0274 | | 0.0005 | | 377 | | 108 | | 189 | | 11 | 174 | 3 | 174 | 3 |
| LY150803-55 |  | | 0.1048 | | | 0.0029 | | 4.3945 | | 0.0974 | | 0.3040 | | 0.0042 | | 1711 | | 22 | | 1711 | | 18 | 1711 | 21 | 1711 | 22 |
| LY150803-56 |  | | 0.0500 | | | 0.0028 | | 0.1903 | | 0.0098 | | 0.0276 | | 0.0004 | | 193 | | 91 | | 177 | | 8 | 176 | 3 | 176 | 3 |
| LY150803-57 |  | | 0.0496 | | | 0.0026 | | 0.1876 | | 0.0091 | | 0.0274 | | 0.0004 | | 177 | | 84 | | 175 | | 8 | 174 | 3 | 174 | 3 |
| LY150803-58 |  | | 0.1062 | | | 0.0031 | | 4.5302 | | 0.1106 | | 0.3094 | | 0.0045 | | 1735 | | 24 | | 1737 | | 20 | 1738 | 22 | 1735 | 24 |
| LY150803-59 |  | | 0.0527 | | | 0.0025 | | 0.3529 | | 0.0157 | | 0.0486 | | 0.0007 | | 315 | | 74 | | 307 | | 12 | 306 | 4 | 306 | 4 |
| LY150803-60 |  | | 0.0529 | | | 0.0016 | | 0.3885 | | 0.0092 | | 0.0533 | | 0.0006 | | 324 | | 32 | | 333 | | 7 | 335 | 4 | 335 | 4 |
| LY150803-61 |  | | 0.0493 | | | 0.0022 | | 0.1758 | | 0.0071 | | 0.0259 | | 0.0004 | | 163 | | 68 | | 164 | | 6 | 165 | 2 | 165 | 2 |
| LY150803-62 |  | | 0.0521 | | | 0.0032 | | 0.3278 | | 0.0192 | | 0.0456 | | 0.0008 | | 290 | | 104 | | 288 | | 15 | 288 | 5 | 288 | 5 |
| LY150803-63 |  | | 0.1535 | | | 0.0051 | | 8.5781 | | 0.2552 | | 0.4054 | | 0.0076 | | 2385 | | 27 | | 2294 | | 27 | 2194 | 35 | 2385 | 27 |
| LY150803-64 |  | | 0.0502 | | | 0.0049 | | 0.2019 | | 0.0188 | | 0.0292 | | 0.0007 | | 206 | | 166 | | 187 | | 16 | 185 | 4 | 185 | 4 |
| LY150803-65 |  | | 0.0526 | | | 0.0042 | | 0.3555 | | 0.0271 | | 0.0490 | | 0.0010 | | 312 | | 137 | | 309 | | 20 | 308 | 6 | 308 | 6 |
| LY150803-66 |  | | 0.1097 | | | 0.0039 | | 4.8515 | | 0.1535 | | 0.3207 | | 0.0056 | | 1795 | | 33 | | 1794 | | 27 | 1793 | 27 | 1795 | 33 |
| LY150803-67 |  | | 0.1059 | | | 0.0035 | | 4.5120 | | 0.1283 | | 0.3089 | | 0.0050 | | 1731 | | 29 | | 1733 | | 24 | 1735 | 24 | 1731 | 29 |
| LY150803-68 |  | | 0.0494 | | | 0.0034 | | 0.1655 | | 0.0107 | | 0.0243 | | 0.0004 | | 165 | | 114 | | 156 | | 9 | 155 | 3 | 155 | 3 |
| LY150803-69 |  | | 0.0531 | | | 0.0030 | | 0.3704 | | 0.0200 | | 0.0506 | | 0.0008 | | 332 | | 93 | | 320 | | 15 | 318 | 5 | 318 | 5 |
| LY150803-70 |  | | 0.0525 | | | 0.0029 | | 0.3655 | | 0.0187 | | 0.0505 | | 0.0008 | | 309 | | 88 | | 316 | | 14 | 317 | 5 | 317 | 5 |
| LY150803-71 |  | | 0.0494 | | | 0.0024 | | 0.1912 | | 0.0087 | | 0.0281 | | 0.0004 | | 166 | | 78 | | 178 | | 7 | 179 | 3 | 179 | 3 |
| LY150803-72 |  | | 0.0499 | | | 0.0028 | | 0.1904 | | 0.0101 | | 0.0277 | | 0.0004 | | 188 | | 93 | | 177 | | 9 | 176 | 3 | 176 | 3 |
| LY150803-73 |  | | 0.0524 | | | 0.0021 | | 0.3594 | | 0.0125 | | 0.0497 | | 0.0007 | | 303 | | 55 | | 312 | | 9 | 313 | 4 | 313 | 4 |
| LY150803-74 |  | | 0.0512 | | | 0.0020 | | 0.2639 | | 0.0092 | | 0.0374 | | 0.0005 | | 250 | | 56 | | 238 | | 7 | 237 | 3 | 237 | 3 |
| LY150803-75 |  | | 0.0497 | | | 0.0027 | | 0.1942 | | 0.0097 | | 0.0283 | | 0.0004 | | 181 | | 87 | | 180 | | 8 | 180 | 3 | 180 | 3 |
| LY150803-77 |  | | 0.1044 | | | 0.0028 | | 4.3567 | | 0.0909 | | 0.3026 | | 0.0040 | | 1704 | | 20 | | 1704 | | 17 | 1704 | 20 | 1704 | 20 |
| LY150803-78 |  | | 0.0499 | | | 0.0034 | | 0.1911 | | 0.0123 | | 0.0278 | | 0.0005 | | 190 | | 114 | | 178 | | 11 | 177 | 3 | 177 | 3 |
| LY150803-79 |  | | 0.0508 | | | 0.0029 | | 0.2406 | | 0.0127 | | 0.0343 | | 0.0005 | | 233 | | 93 | | 219 | | 10 | 218 | 3 | 218 | 3 |
| LY150803-80 |  | | 0.0525 | | | 0.0023 | | 0.3404 | | 0.0136 | | 0.0471 | | 0.0007 | | 306 | | 65 | | 297 | | 10 | 296 | 4 | 296 | 4 |
| LY150803-81 |  | | 0.0493 | | | 0.0022 | | 0.1955 | | 0.0081 | | 0.0288 | | 0.0004 | | 160 | | 71 | | 181 | | 7 | 183 | 3 | 183 | 3 |
| LY150803-82 |  | | 0.0540 | | | 0.0030 | | 0.4294 | | 0.0225 | | 0.0577 | | 0.0010 | | 371 | | 88 | | 363 | | 16 | 362 | 6 | 362 | 6 |
| LY150803-83 |  | | 0.0495 | | | 0.0038 | | 0.2027 | | 0.0147 | | 0.0297 | | 0.0005 | | 171 | | 130 | | 187 | | 12 | 189 | 3 | 189 | 3 |
| LY150803-84 |  | | 0.0511 | | | 0.0017 | | 0.2746 | | 0.0077 | | 0.0390 | | 0.0005 | | 245 | | 42 | | 246 | | 6 | 246 | 3 | 246 | 3 |
| LY150803-85 |  | | 0.0518 | | | 0.0033 | | 0.2965 | | 0.0180 | | 0.0415 | | 0.0007 | | 276 | | 108 | | 264 | | 14 | 262 | 4 | 262 | 4 |
| LY150803-86 |  | | 0.0508 | | | 0.0016 | | 0.2492 | | 0.0064 | | 0.0356 | | 0.0004 | | 233 | | 37 | | 226 | | 5 | 225 | 3 | 225 | 3 |
| LY150803-87 |  | | 0.0526 | | | 0.0029 | | 0.3472 | | 0.0180 | | 0.0479 | | 0.0008 | | 311 | | 89 | | 303 | | 14 | 302 | 5 | 302 | 5 |
| LY150803-88 |  | | 0.0513 | | | 0.0026 | | 0.2773 | | 0.0129 | | 0.0392 | | 0.0006 | | 254 | | 79 | | 249 | | 10 | 248 | 4 | 248 | 4 |
| LY150803-89 |  | | 0.0491 | | | 0.0022 | | 0.1882 | | 0.0077 | | 0.0278 | | 0.0004 | | 151 | | 70 | | 175 | | 7 | 177 | 2 | 177 | 2 |
| LY150803-91 |  | | 0.0499 | | | 0.0020 | | 0.1901 | | 0.0068 | | 0.0277 | | 0.0004 | | 189 | | 59 | | 177 | | 6 | 176 | 2 | 176 | 2 |
| LY150803-92 |  | | 0.0531 | | | 0.0027 | | 0.3807 | | 0.0179 | | 0.0520 | | 0.0008 | | 334 | | 79 | | 328 | | 13 | 327 | 5 | 327 | 5 |
| LY150803-93 |  | | 0.0488 | | | 0.0036 | | 0.1700 | | 0.0121 | | 0.0253 | | 0.0004 | | 139 | | 128 | | 159 | | 11 | 161 | 3 | 161 | 3 |
| LY150803-94 |  | | 0.1052 | | | 0.0028 | | 4.4390 | | 0.0947 | | 0.3060 | | 0.0041 | | 1718 | | 21 | | 1720 | | 18 | 1721 | 20 | 1718 | 21 |
| LY150803-95 |  | | 0.0521 | | | 0.0022 | | 0.3204 | | 0.0124 | | 0.0446 | | 0.0006 | | 292 | | 63 | | 282 | | 10 | 281 | 4 | 281 | 4 |
| LY150803-96 |  | | 0.0496 | | | 0.0054 | | 0.1856 | | 0.0195 | | 0.0271 | | 0.0007 | | 177 | | 189 | | 173 | | 17 | 173 | 4 | 173 | 4 |
| LY150803-97 |  | | 0.0506 | | | 0.0022 | | 0.2599 | | 0.0105 | | 0.0372 | | 0.0005 | | 224 | | 66 | | 235 | | 8 | 236 | 3 | 236 | 3 |
| LY150803-98 |  | | 0.0500 | | | 0.0042 | | 0.1992 | | 0.0161 | | 0.0289 | | 0.0006 | | 196 | | 144 | | 184 | | 14 | 184 | 4 | 184 | 4 |
| LY150803-99 |  | | 0.0511 | | | 0.0041 | | 0.2648 | | 0.0204 | | 0.0376 | | 0.0008 | | 246 | | 137 | | 239 | | 16 | 238 | 5 | 238 | 5 |
| LY150803-100 |  | | 0.0571 | | | 0.0014 | | 0.6365 | | 0.0107 | | 0.0809 | | 0.0009 | | 493 | | 19 | | 500 | | 7 | 502 | 5 | 502 | 5 |
| LY150803-101 |  | | 0.0646 | | | 0.0020 | | 0.2290 | | 0.0059 | | 0.0257 | | 0.0003 | | 314 | | 117 | | 171 | | 8 | 161 | 2 | 161 | 2 |
| LY150803-102 |  | | 0.0499 | | | 0.0017 | | 0.1925 | | 0.0056 | | 0.0280 | | 0.0004 | | 190 | | 44 | | 179 | | 5 | 178 | 2 | 178 | 2 |
| LY150803-103 |  | | 0.0527 | | | 0.0041 | | 0.3592 | | 0.0270 | | 0.0495 | | 0.0010 | | 314 | | 133 | | 312 | | 20 | 311 | 6 | 311 | 6 |
| LY150803-104 |  | | 0.0529 | | | 0.0019 | | 0.3618 | | 0.0110 | | 0.0497 | | 0.0006 | | 322 | | 46 | | 314 | | 8 | 312 | 4 | 312 | 4 |
| LY150803-105 |  | | 0.0661 | | | 0.0019 | | 0.9056 | | 0.0213 | | 0.0993 | | 0.0012 | | 810 | | 29 | | 655 | | 11 | 610 | 7 | 610 | 7 |
| LY150803-106 |  | | 0.0507 | | | 0.0027 | | 0.2039 | | 0.0103 | | 0.0292 | | 0.0005 | | 225 | | 87 | | 188 | | 9 | 186 | 3 | 186 | 3 |
| LY150803-107 |  | | 0.0499 | | | 0.0024 | | 0.2096 | | 0.0092 | | 0.0304 | | 0.0004 | | 192 | | 75 | | 193 | | 8 | 193 | 3 | 193 | 3 |
| LY150803-108 |  | | 0.0508 | | | 0.0024 | | 0.2794 | | 0.0122 | | 0.0399 | | 0.0006 | | 234 | | 74 | | 250 | | 10 | 252 | 4 | 252 | 4 |
| LY150803-109 |  | | 0.0487 | | | 0.0022 | | 0.1779 | | 0.0073 | | 0.0265 | | 0.0004 | | 134 | | 69 | | 166 | | 6 | 169 | 2 | 169 | 2 |
| LY150803-110 |  | | 0.1145 | | | 0.0026 | | 5.3093 | | 0.0794 | | 0.3364 | | 0.0040 | | 1871 | | 12 | | 1870 | | 13 | 1869 | 19 | 1871 | 12 |
| LY150803-111 |  | | 0.0496 | | | 0.0029 | | 0.1902 | | 0.0105 | | 0.0278 | | 0.0005 | | 174 | | 97 | | 177 | | 9 | 177 | 3 | 177 | 3 |
| LY150803-112 |  | | 0.0508 | | | 0.0024 | | 0.2655 | | 0.0113 | | 0.0379 | | 0.0005 | | 231 | | 72 | | 239 | | 9 | 240 | 3 | 240 | 3 |
| LY150803-113 |  | | 0.1056 | | | 0.0032 | | 4.4727 | | 0.1115 | | 0.3071 | | 0.0045 | | 1725 | | 25 | | 1726 | | 21 | 1727 | 22 | 1725 | 25 |
| LY150803-114 |  | | 0.0498 | | | 0.0029 | | 0.1785 | | 0.0096 | | 0.0260 | | 0.0004 | | 184 | | 95 | | 167 | | 8 | 166 | 3 | 166 | 3 |
| LY150803-116 |  | | 0.0581 | | | 0.0028 | | 0.6810 | | 0.0299 | | 0.0850 | | 0.0013 | | 533 | | 68 | | 527 | | 18 | 526 | 8 | 526 | 8 |
| LY150803-117 |  | | 0.0531 | | | 0.0021 | | 0.3546 | | 0.0126 | | 0.0485 | | 0.0007 | | 332 | | 56 | | 308 | | 9 | 305 | 4 | 305 | 4 |
| LY150803-118 |  | | 0.0498 | | | 0.0015 | | 0.2078 | | 0.0050 | | 0.0303 | | 0.0004 | | 187 | | 34 | | 192 | | 4 | 192 | 2 | 192 | 2 |
| LY150803-119 |  | | 0.0522 | | | 0.0027 | | 0.3639 | | 0.0174 | | 0.0505 | | 0.0008 | | 296 | | 81 | | 315 | | 13 | 318 | 5 | 318 | 5 |
| LY150803-120 |  | | 0.0561 | | | 0.0022 | | 0.5484 | | 0.0189 | | 0.0710 | | 0.0010 | | 454 | | 52 | | 444 | | 12 | 442 | 6 | 442 | 6 |
